# Supplementary material
Source: publisher site journal article supplement (https://www.dovepress.com/article/298540)
Supplement: Supplementary file 1 [file get_supplementary_file.php]

## **Supplemental Material**

Electroacupuncture ameliorates depressive-like behaviors in poststroke rats via activating the tPA/BDNF/TrkB pathway

## Supplementary Figure 1

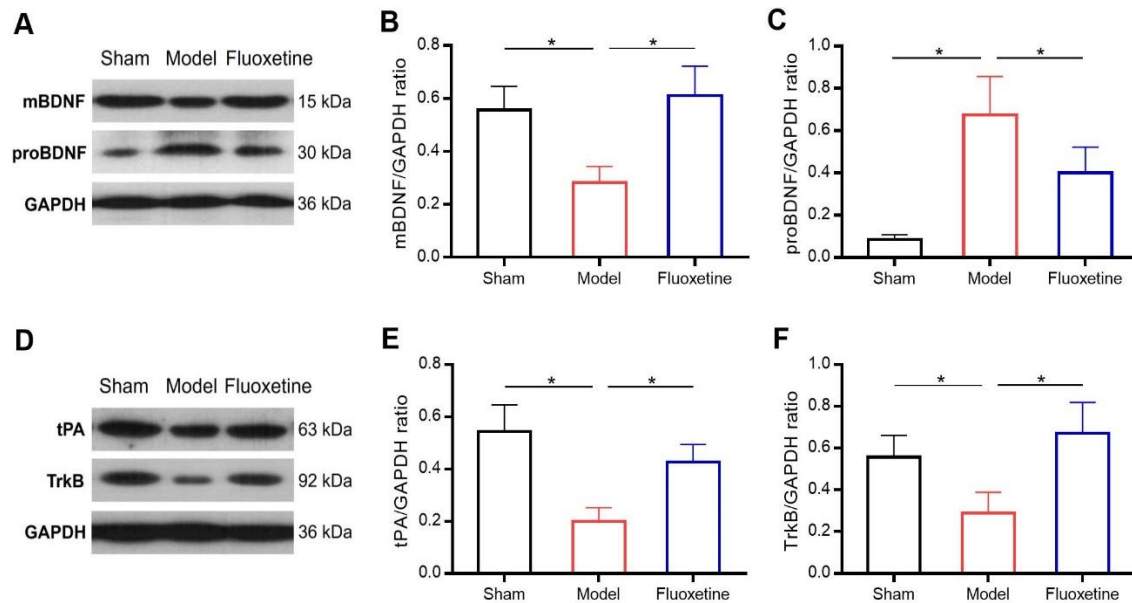

**Figure S1** The effect of fluoxetine on mBDNF, proBDNF, tPA, and TrkB expressions in the prefrontal cortex of PSD rats. Representative immunoblots (A) and densitometry analysis of mBDNF and proBDNF (B-C) expressions in the prefrontal cortex. Representative immunoblots (D) and densitometry analysis of tPA and TrkB (E-F) expressions in the prefrontal cortex. \* $P < 0.05$ , compared as indicated.

## Supplementary Figure 2

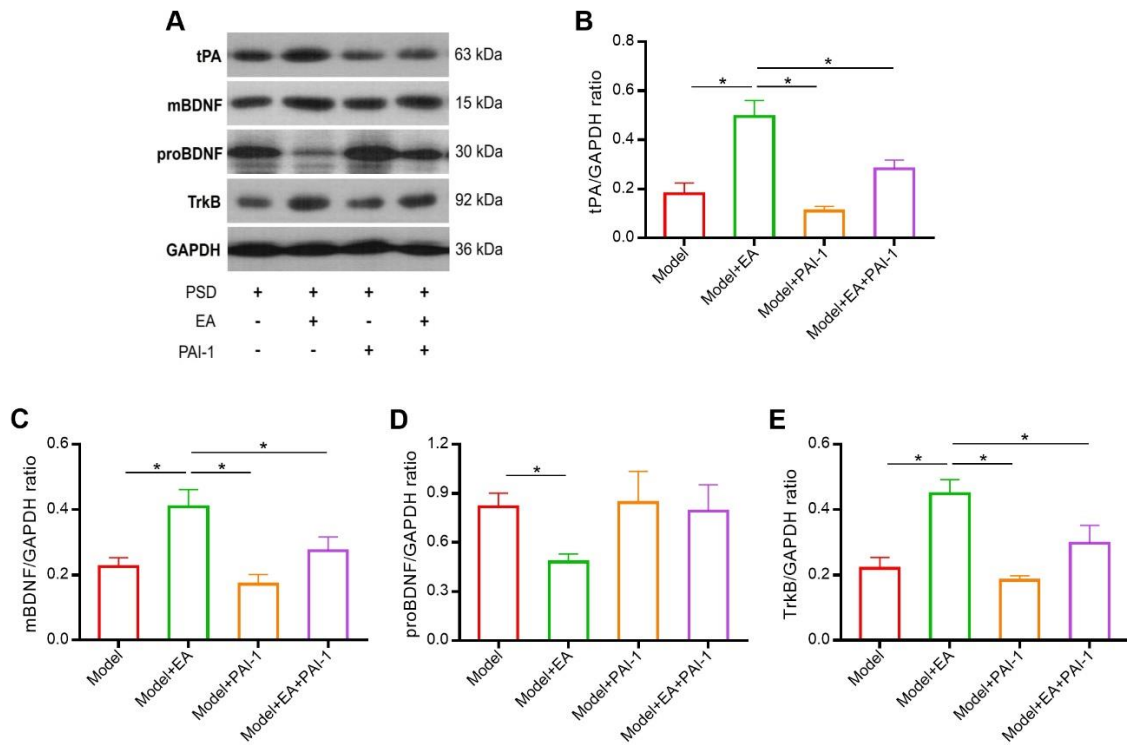

**Figure S2** The effect of PAI-1 on tPA, mBDNF, proBDNF, and TrkB expressions in the prefrontal cortex of PSD rats. Representative immunoblots (A) and densitometry analysis of mBDNF and proBDNF (B-E) expressions in the prefrontal cortex. \* $P < 0.05$ , compared as indicated.
